# Supplementary material for: Interactions between arbuscular mycorrhizal fungi and soil properties jointly influence plant C, N, and P stoichiometry in West Lake, Hangzhou
Source: Royal Society of Chemistry journal article supplement (doi:10.1039/d0ra08185j), 2020-01-01

**Table S1** Results of the multiple correspondence analyses of variables in categories of AMF infection characteristics, soil properties, C, N, and P contents and their stoichiometric ratios of plant communities.

| <b>Variables</b>                     | <b>Component 1</b> | <b>Variables</b>                         | <b>Component 1</b> |
|--------------------------------------|--------------------|------------------------------------------|--------------------|
| <b>AMF infection characteristics</b> |                    | <b>C, N, and P stoichiometric ratios</b> |                    |
| F                                    | 0.899              | Aboveground biomass C/N                  | -0.657             |
| R                                    | 0.774              | Root C/N                                 | -0.015             |
| AR                                   | 0.826              | Above ground biomass C/P                 | 0.555              |
| FR                                   | 0.144              | Root C/P                                 | 0.975              |
| Eigenvalue                           | 2.111              | Aboveground biomass N/P                  | 0.974              |
| Cumulative variance (%)              | 52.770             | Root N/P                                 | 0.723              |
| <b>Soil properties</b>               |                    | Eigenvalue                               | 3.163              |
| STC                                  | 0.990              | Cumulative variance (%)                  | 52.711             |
| STN                                  | -0.984             |                                          |                    |
| STP                                  | 0.991              |                                          |                    |
| Eigenvalue                           | 2.929              |                                          |                    |
| Cumulative variance (%)              | 97.633             |                                          |                    |
| <b>Plant C, N, and P contents</b>    |                    |                                          |                    |
| Aboveground biomass C                | 0.815              |                                          |                    |
| Root C                               | 0.621              |                                          |                    |
| Above ground biomass N               | 0.614              |                                          |                    |
| Root N                               | -0.284             |                                          |                    |
| Aboveground biomass P                | 0.731              |                                          |                    |
| Root P                               | -0.981             |                                          |                    |
| Eigenvalue                           | 2.886              |                                          |                    |
| Cumulative variance (%)              | 48.099             |                                          |                    |

Fig. S1 The conceptual model displaying the expected direct and indirect pathways for soil properties on AMF infection and plants C, N, P stoichiometry. Single-headed arrows refer to unidirectional causal relationships, and double-headed arrows indicate non-causal covariance.

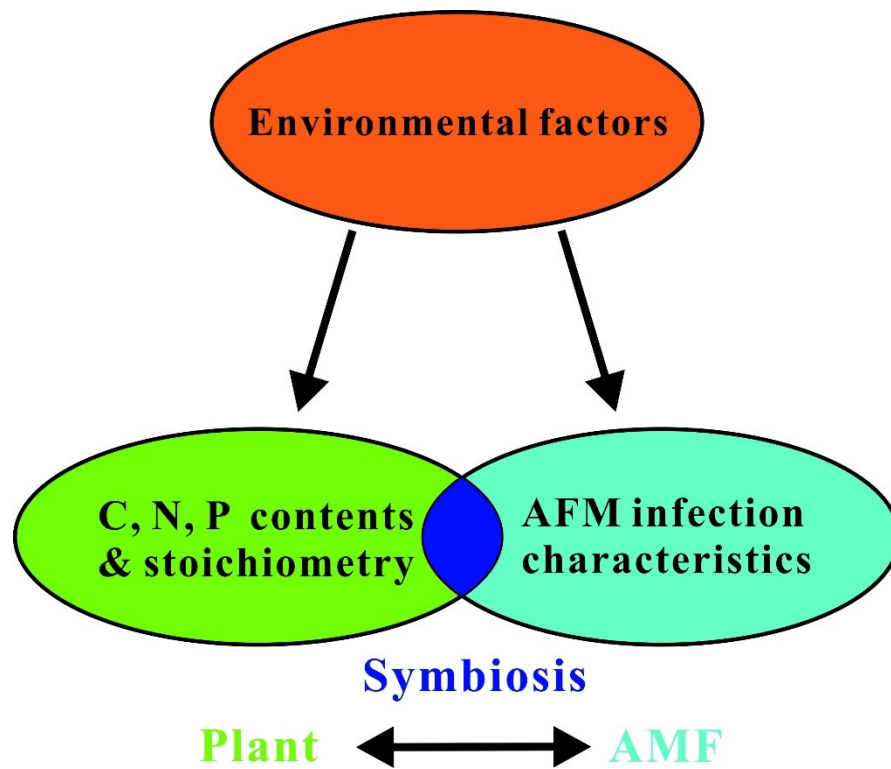

Supplement: d0ra08185j1.pdf [file d0ra08185j1.pdf]
